# Supplementary material for: Ratiometric fluorescent sensors for nitrite detection in the environment based on carbon dot/Rhodamine B systems
Source: Royal Society of Chemistry journal article supplement (doi:10.1039/d2ra00973k), 2022-01-01
Supplement: d2ra00973k1.pdf [file d2ra00973k1.pdf]

## Electronic Supplementary Material

### **Ratiometric fluorescent sensors for nitrite detection in the environment based on carbon dot/ Rhodamine B systems**

Huihui Tao,<sup>a,b</sup> Zhao Zhang,<sup>a,b</sup> Qiao Cao,<sup>b</sup> Lingfei Li,<sup>c</sup> Shihao Xu,<sup>c</sup> Changlong Jiang,<sup>c</sup>

Yucheng Li,<sup>\*a</sup> Yingying Liu<sup>\*b</sup>

<sup>a</sup> School of Resources and Environmental Engineering, Anhui University, Anhui province, Hefei, 230601, P. R. China. Email: li-yucheng@163.com

<sup>b</sup> Institute of Intelligent Machines, Hefei Institutes of Physical Science, Chinese Academy of Sciences, Hefei 230031, P. R. China. Email: yyliu@iim.ac.cn

<sup>c</sup> Institute of Solid State Physics, Hefei Institutes of Physical Science, Chinese Academy of Sciences, Hefei 230031, P. R. China.

## Contents

|                                                                                        |    |
|----------------------------------------------------------------------------------------|----|
| Fig. S1 The XPS spectra of BCDs.....                                                   | S1 |
| Fig. S2 Fluorescence spectra of BCDs, RhB and the probe.....                           | S1 |
| Fig. S3 Stability of colorimetric fluorescent probe .....                              | S2 |
| Fig. S4 The response to $\text{NO}_2^-$ .....                                          | S3 |
| Fig. S5 Optimal fluorescence intensity ratio.....                                      | S3 |
| Fig. S6 Fluorescence spectra of ratiometric fluorescent probe to $\text{NO}_2^-$ ..... | S4 |
| Fig. S7 The response time of ratiometric fluorescent probe.....                        | S4 |
| Fig. S8 The masking effect of EDTA on $\text{Hg}^{2+}$ .....                           | S4 |
| Fig. S9 Influence of ion strength on fluorescence intensity .....                      | S5 |
| Fig. S10 The absorbance of the BCDs, BCDs+ $\text{NO}_2^-$ and the magenta dye.....    | S5 |
| Fig. S11 TEM image of BCDs+ $\text{NO}_2^-$ .....                                      | S6 |
| Fig. S12 Test paper detect $\text{NO}_2^-$ .....                                       | S6 |
| Fig. S13 The fluorescent test paper without or with Nafion solution.....               | S6 |
| Fig. S14 Effect of Nafion on ratiometric fluorescent probe.....                        | S7 |
| Fig. S15 The commercial test papers detect $\text{NO}_2^-$ .....                       | S7 |
| Table S1 Ratiometric fluorescent probe to $\text{NO}_2^-$ .....                        | S8 |
| Table S2 Comparison different CDs fluorescent probes.....                              | S8 |
| Table S3 Detection of real samples using different methods .....                       | S9 |
| Table S4 Different methods for the detection of $\text{NO}_2^-$ .....                  | S9 |

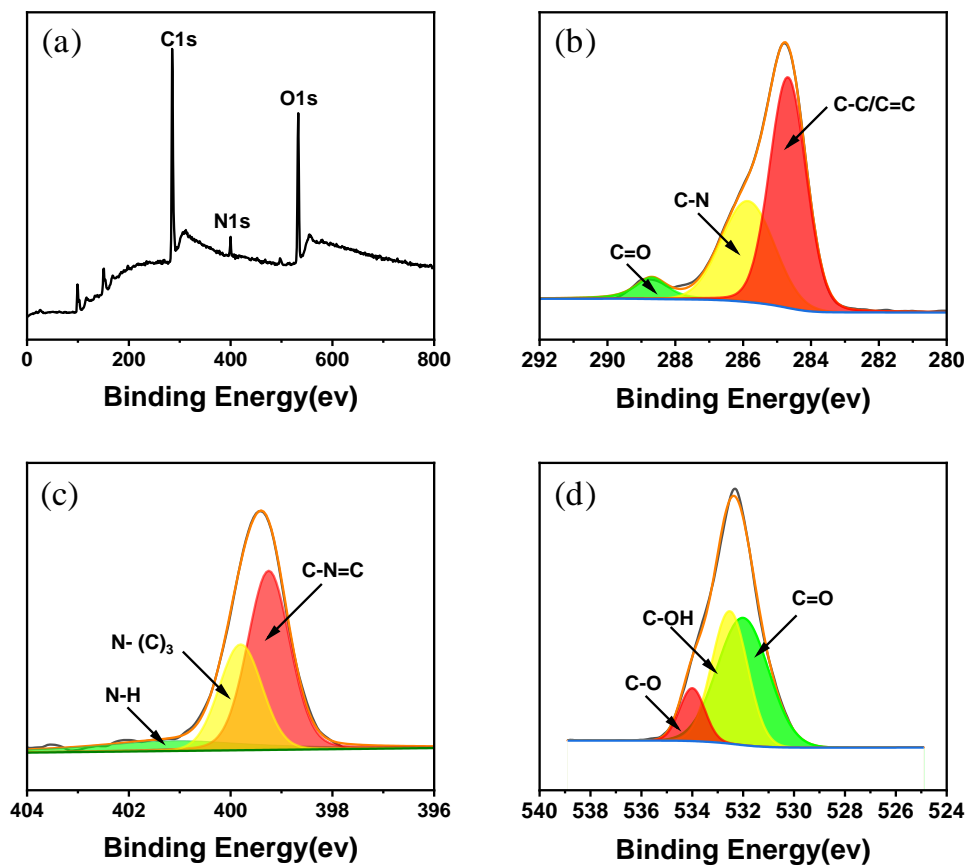

Fig. S1 (a) Broad range XPS spectra of BCDs; (b) The XPS C1s; (c) the XPS N1s and (d) the XPS O1s of BCDs.

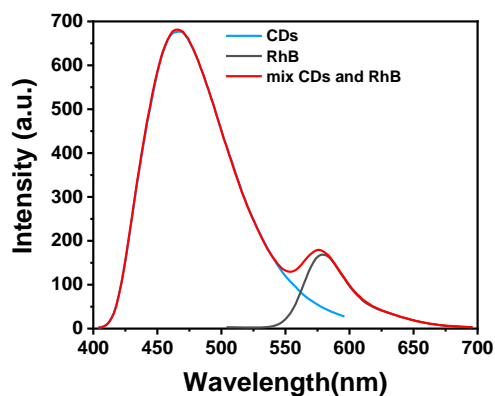

Fig. S2 Fluorescence emission spectra ( $\lambda_{\text{ex}} = 365 \text{ nm}$ ) of BCDs (the blue curve), RhB (the black curve) and mixing BCDs and RhB (the red curve), respectively.

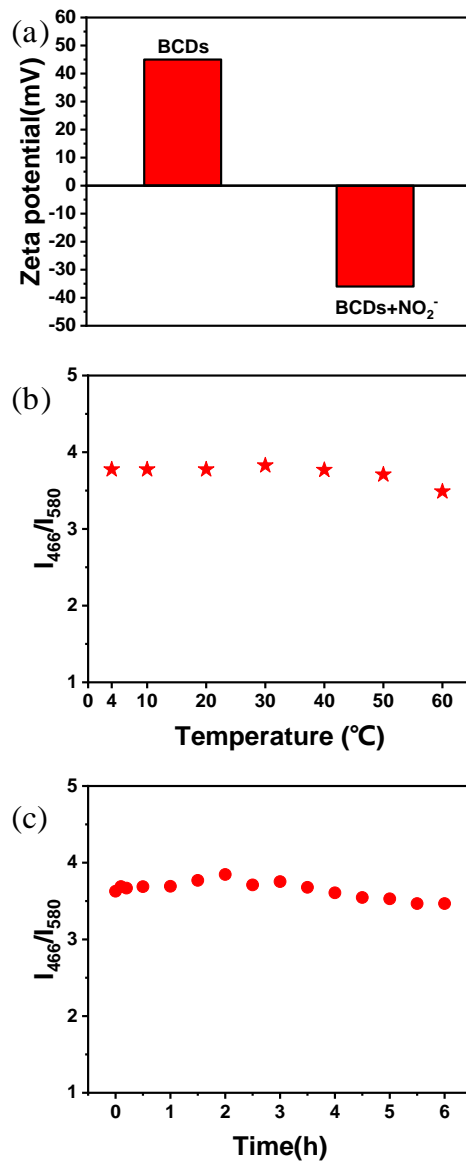

Fig. S3 (a) Zeta Potential of BCDs and BCDs+NO<sub>2</sub><sup>-</sup>; (b) Photostability of ratiometric fluorescent probe with exposed to 365 nm UV lamp ( $I_{466}$  and  $I_{580}$  are the fluorescence intensities of BCDs and RhB); (c) Effect of temperature on ratiometric fluorescent probe.

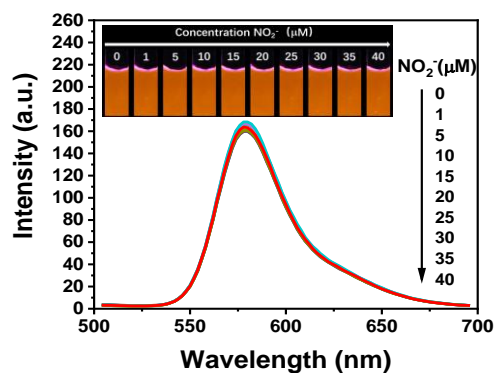

Fig. S4 The fluorescent emission spectra of RhB with the addition of  $\text{NO}_2^-$ .

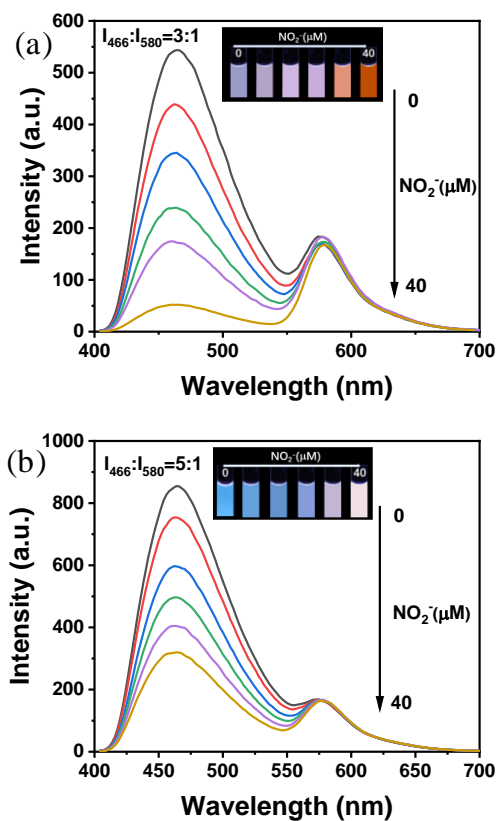

Fig. S5 Fluorescence spectra of the ratiometric fluorescent probe with the addition of  $\text{NO}_2^-$ . The initial fluorescence intensities of BCDs and RhB were adjusted to a ratio of (a) 3/1 and (b) 5/1. The insets show the corresponding fluorescent photos under a 365 nm UV lamp.

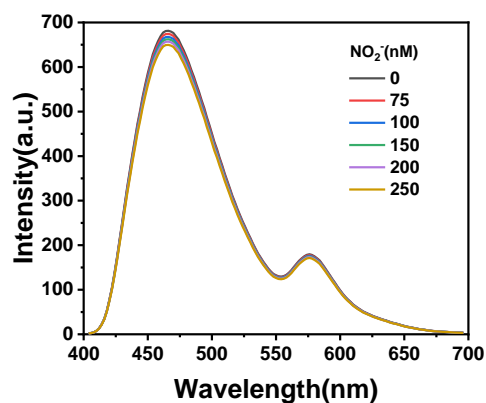

Fig. S6 Fluorescence spectra of  $\text{NO}_2^-$  with a concentration of 0 to 250 nM added to the ratiometric fluorescent probe solution.

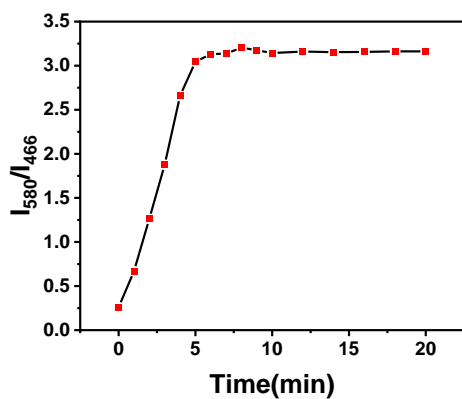

Fig. S7 The response time of ratiometric fluorescent probe to  $40 \mu\text{M NO}_2^-$ .

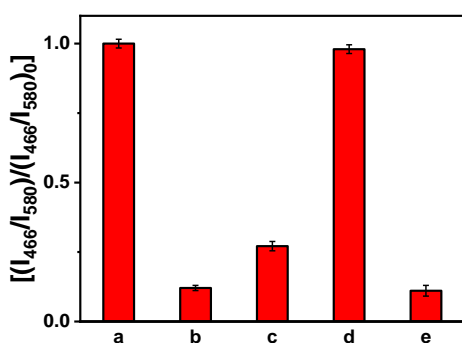

Fig. S8 The masking effect of 0.5 mM EDTA on  $\text{Hg}^{2+}$ . (a) Blank. (b) The addition of  $40 \mu\text{M NO}_2^-$ . (c) The addition of  $400 \mu\text{M Hg}^{2+}$ . (d) The addition of  $400 \mu\text{M Hg}^{2+}$  with 0.5 mM EDTA. (e) A further addition of  $40 \mu\text{M NO}_2^-$  in (d).

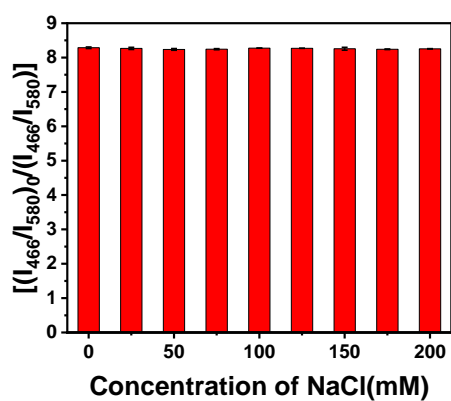

Fig. S9 Influence of ion strength on fluorescence intensity. Concentration:  $\text{NO}_2^-$ , 40  $\mu\text{M}$ ; NaCl, 0, 25, 50, 75, 100, 125, 150, 175, 200 mM; PBS pH 3, 30 mM.

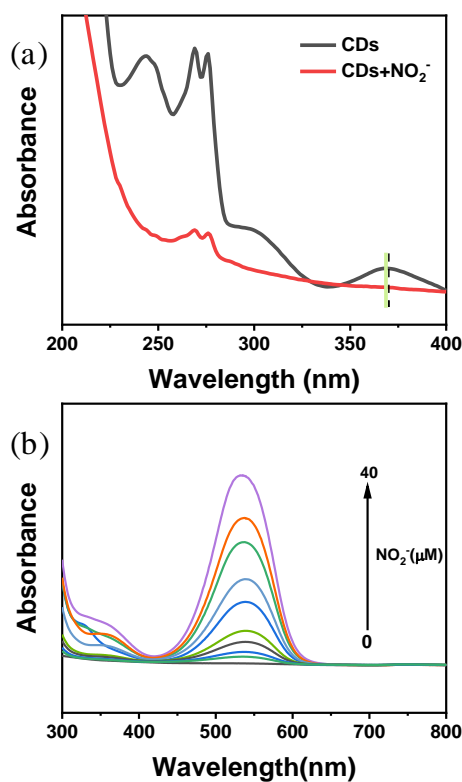

Fig. S10 (a) UV-vis spectrum of the BCDs and BCDs+ $\text{NO}_2^-$ ; (b) UV-vis spectrum of the magenta dye is proportional to the concentration of  $\text{NO}_2^-$ . Concentration: NED, 0.15 mM;  $\text{NO}_2^-$ , 0 - 40  $\mu\text{M}$ ; PBS pH 3, 30 mM.

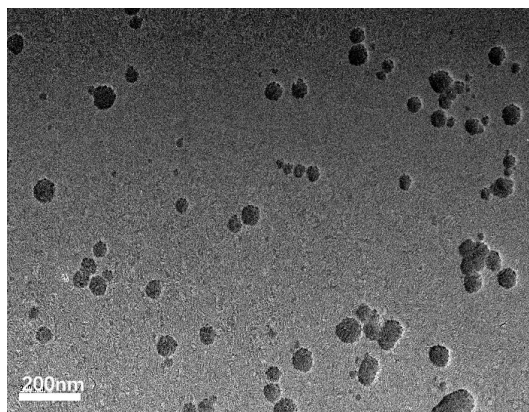

Fig. S11 TEM image of BCDs+NO<sub>2</sub><sup>-</sup>.

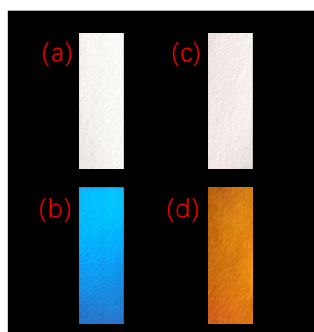

Fig. S12 (a) The fluorescent test paper without UV light; (b) The fluorescent test paper with UV light.

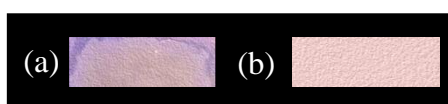

Fig. S13 (a) The fluorescent test paper without Nafion solution + 30 μM NO<sub>2</sub><sup>-</sup> under UV light; (b) The fluorescent test paper with Nafion solution + 30 μM NO<sub>2</sub><sup>-</sup> under UV light.



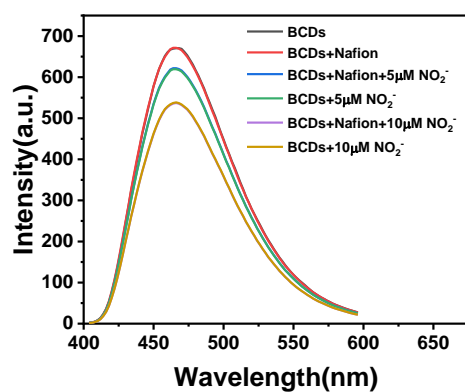

Fig. S14 Effect of 0.5% Nafion (10 μL) on BCDs (25 μL, 60 μg/mL) and the detection of NO<sub>2</sub><sup>-</sup> by BCDs.

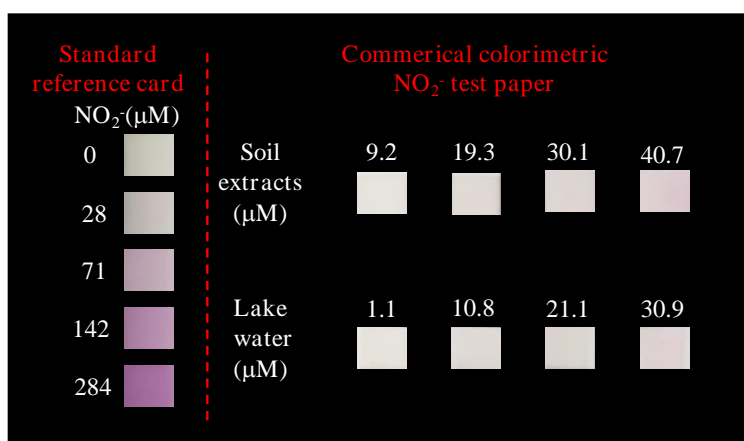

Fig. S15 Commercial test paper for the detection of NO<sub>2</sub><sup>-</sup> in different environmental samples. The standard reference card on the right is provided by the merchant. The photos were taken under indoor light.

Table S1 Detection results of nitrite in standard concentration based on fluorescent probe system (n=3).

| Spiked concentration (nM) | Found (nM)  | Recovery (%) | RSD (%) |
|---------------------------|-------------|--------------|---------|
| 65                        | -4.19±0.13  | -            | -       |
| 70                        | -6.83±0.28  | -            | -       |
| 75                        | 69.02±2.22  | 92.02        | 3.21    |
| 100                       | 106.31±3.15 | 106.31       | 2.96    |
| 150                       | 162.91±5.41 | 108.61       | 3.32    |
| 200                       | 197.36±7.14 | 98.66        | 3.62    |
| 250                       | 254.32±7.63 | 101.73       | 3.00    |

Table S2 Detection results of nitrite in soil and lake water samples based on standard method and fluorescent probe system.

| Sample             | Spiked concentration | Found <sup>a</sup> | Recovery (%) | RSD (%) | Standard method <sup>b</sup> | Relative error (%) |
|--------------------|----------------------|--------------------|--------------|---------|------------------------------|--------------------|
| Soil samples       | 0                    | 2.12±0.05          | -            | 2.50    | 2.19±0.07                    | 3.30               |
|                    | 2.3                  | 4.43±0.12          | 101.10       | 2.69    | 4.53±0.09                    | 2.26               |
|                    | 4.6                  | 6.91±0.16          | 104.40       | 2.33    | 6.76±0.15                    | 2.17               |
|                    | 6.9                  | 9.36±0.19          | 105.03       | 2.06    | 9.23±0.16                    | 1.39               |
| Lake water samples | 0                    | 0.05±0.001         | -            | 2.78    | 0.05±0.001                   | 0                  |
|                    | 0.46                 | 0.50±0.01          | 97.83        | 2.82    | 0.52±0.01                    | 4.00               |
|                    | 0.92                 | 0.97±0.03          | 100.05       | 2.85    | 0.95±0.02                    | 2.06               |
|                    | 1.38                 | 1.42±0.02          | 99.28        | 1.17    | 1.43±0.02                    | 0.70               |

<sup>a</sup> Concentrations of soil samples and lake water samples are in mg/kg and mg/L, respectively.

<sup>b</sup> Standard method of soil samples came from HJ 634-2012; Standard method of lake water came from GB 7493-87.

Table S3 Detection of real samples using different methods.

| Sample number                        | Soil Extracts                                                                     |                                                                                   | Lake Water                                                                        |                                                                                    | Fish Pond Water                                                                     | Gutter Water                                                                        |
|--------------------------------------|-----------------------------------------------------------------------------------|-----------------------------------------------------------------------------------|-----------------------------------------------------------------------------------|------------------------------------------------------------------------------------|-------------------------------------------------------------------------------------|-------------------------------------------------------------------------------------|
|                                      | S-2                                                                               | S-3                                                                               | L-2                                                                               | L-3                                                                                | F-1                                                                                 | G-1                                                                                 |
| Fluorescence method( $\mu\text{M}$ ) | 4.84 $\pm$ 0.11                                                                   | 7.12 $\pm$ 0.18                                                                   | 0.74 $\pm$ 0.03                                                                   | 0.83 $\pm$ 0.02                                                                    | 4.27 $\pm$ 0.12                                                                     | 18.97 $\pm$ 0.34                                                                    |
| Standard method( $\mu\text{M}$ )     | 4.97 $\pm$ 0.14                                                                   | 7.25 $\pm$ 0.15                                                                   | 0.76 $\pm$ 0.03                                                                   | 0.86 $\pm$ 0.05                                                                    | 4.14 $\pm$ 0.11                                                                     | 19.44 $\pm$ 0.53                                                                    |
| Relative error (%)                   | 2.69                                                                              | 1.83                                                                              | 2.70                                                                              | 3.53                                                                               | 3.15                                                                                | 2.46                                                                                |
| Test paper                           |  |  |  |  |  |  |

Table S4 Comparison of the analytical performance of different methods for the detection of  $\text{NO}_2^-$ .

| Method             | Indicator                           | Linear range ( $\mu\text{M}$ ) | LOD ( $\mu\text{M}$ ) | Reference |
|--------------------|-------------------------------------|--------------------------------|-----------------------|-----------|
| Electrochemical    | AuNPs- $\text{Fe}_2\text{O}_3$      | 1-1000                         | 0.07                  | [1]       |
| Colorimetric       | Fuorescent probe P- $\text{NO}_2^-$ | 0.5-10                         | 0.075                 | [2]       |
| Ion Chromatography | -                                   | 0-86                           | 2.82                  | [3]       |

## Reference

- 1 S. H. Kang, P. Pana, H. M. Zhang, G. Z. Wang, Y. X. Wang, C. Zhang, Y. X. Zhang, H. J. Zhao, H. J. Zhou, and W. P. Cai, *Inorg. Chem. Front.*, 2019, **6**, 1432-1441
- 2 J. Xu, Y. F. Shi, S. S. Yang, J. L. Yang, X. Zhang, L. R. Xu, Z. Bian, Z. H. Xu and B. C. Zhu, *Microchem. J.*, 2021, **169**, 106342-106347.
- 3 D. Coviello, R. Pascale, R. Ciriello, A. M. Salvi, A. Guerrieri, M. Contursi, L. Scrano, S. A. Bufo, T. R. I. Cataldi and G. Bianco, *Foods*, 2020, **9**, 1238-1248.
